# Supplementary material
Source: PubMed Central journal article supplement (PMC4125401)
Supplement: supp_114.165514_TableS1.pdf [file supp_114.165514_TableS1.pdf]

TABLE S1: Probability  $p_{\epsilon}(j)$  of observed nucleotide read  $j$  at site  $\alpha$  with two-locus genotype  $g$  as a function of the error rate  $\epsilon$ .

| Genotype          | Nucleotide read                                                           |                                                                           |                       |
|-------------------|---------------------------------------------------------------------------|---------------------------------------------------------------------------|-----------------------|
|                   | 1 ( $A$ )                                                                 | 2 ( $a$ )                                                                 | 3 ( $e$ )             |
| 1<br>( $AB/AB$ )  | $1 - \epsilon$                                                            | $\frac{\epsilon}{3}$                                                      | $\frac{2\epsilon}{3}$ |
| 2<br>( $Ab/Ab$ )  | $1 - \epsilon$                                                            | $\frac{\epsilon}{3}$                                                      | $\frac{2\epsilon}{3}$ |
| 3<br>( $aB/aB$ )  | $\frac{\epsilon}{3}$                                                      | $1 - \epsilon$                                                            | $\frac{2\epsilon}{3}$ |
| 4<br>( $ab/ab$ )  | $\frac{\epsilon}{3}$                                                      | $1 - \epsilon$                                                            | $\frac{2\epsilon}{3}$ |
| 5<br>( $AB/Ab$ )  | $1 - \epsilon$                                                            | $\frac{\epsilon}{3}$                                                      | $\frac{2\epsilon}{3}$ |
| 6<br>( $aB/ab$ )  | $\frac{\epsilon}{3}$                                                      | $1 - \epsilon$                                                            | $\frac{2\epsilon}{3}$ |
| 7<br>( $AB/aB$ )  | $\frac{1}{2} \cdot (1 - \epsilon) + \frac{1}{2} \cdot \frac{\epsilon}{3}$ | $\frac{1}{2} \cdot \frac{\epsilon}{3} + \frac{1}{2} \cdot (1 - \epsilon)$ | $\frac{2\epsilon}{3}$ |
| 8<br>( $Ab/ab$ )  | $\frac{1}{2} \cdot (1 - \epsilon) + \frac{1}{2} \cdot \frac{\epsilon}{3}$ | $\frac{1}{2} \cdot \frac{\epsilon}{3} + \frac{1}{2} \cdot (1 - \epsilon)$ | $\frac{2\epsilon}{3}$ |
| 9<br>( $AB/ab$ )  | $\frac{1}{2} \cdot (1 - \epsilon) + \frac{1}{2} \cdot \frac{\epsilon}{3}$ | $\frac{1}{2} \cdot \frac{\epsilon}{3} + \frac{1}{2} \cdot (1 - \epsilon)$ | $\frac{2\epsilon}{3}$ |
| 10<br>( $Ab/aB$ ) | $\frac{1}{2} \cdot (1 - \epsilon) + \frac{1}{2} \cdot \frac{\epsilon}{3}$ | $\frac{1}{2} \cdot \frac{\epsilon}{3} + \frac{1}{2} \cdot (1 - \epsilon)$ | $\frac{2\epsilon}{3}$ |

$A$  and  $a$  denote candidate alleles (the two most abundant nucleotide reads in the population, e.g., C and T) and  $e$  denotes other nucleotide reads (e.g., in this case A and G) at site  $\alpha$ .  $B$  and  $b$  denote candidate alleles at site  $\beta$ . In the two-locus genotype notation, the slash separates haplotypes.
