# Supplementary material
Source: PubMed Central journal article supplement (PMC4125401)
Supplement: supp_114.165514_TableS2.pdf [file supp_114.165514_TableS2.pdf]

TABLE S2: Probability  $p_g(j)$  of observed dinucleotide read  $j$  at the two sites of interest with two-locus genotype  $g$  as a function of the error rate  $\epsilon$ .

| Genotype         | Dinucleotide read                                                                                               |                                                                                              |                                                |                                                                                                                 |                                                                                                                 |                                                |                                                                                                                             |                                                                                                          |                                      |
|------------------|-----------------------------------------------------------------------------------------------------------------|----------------------------------------------------------------------------------------------|------------------------------------------------|-----------------------------------------------------------------------------------------------------------------|-----------------------------------------------------------------------------------------------------------------|------------------------------------------------|-----------------------------------------------------------------------------------------------------------------------------|----------------------------------------------------------------------------------------------------------|--------------------------------------|
|                  | 1 ( $AB$ )                                                                                                      | 2 ( $Ab$ )                                                                                   | 3 ( $Ae$ )                                     | 4 ( $aB$ )                                                                                                      | 5 ( $ab$ )                                                                                                      | 6 ( $ae$ )                                     | 7 ( $eB$ )                                                                                                                  | 8 ( $eb$ )                                                                                               | 9 ( $ee$ )                           |
| 1<br>( $AB/AB$ ) | $(1-\epsilon)^2$                                                                                                | $(1-\epsilon) \cdot \frac{\epsilon}{3}$                                                      | $(1-\epsilon) \cdot \frac{2\epsilon}{3}$       | $\frac{\epsilon}{3} \cdot (1-\epsilon)$                                                                         | $\left(\frac{\epsilon}{3}\right)^2$                                                                             | $\frac{\epsilon}{3} \cdot \frac{2\epsilon}{3}$ | $\frac{2\epsilon}{3} \cdot (1-\epsilon)$                                                                                    | $\frac{2\epsilon}{3} \cdot \frac{\epsilon}{3}$                                                           | $\left(\frac{2\epsilon}{3}\right)^2$ |
| 2<br>( $Ab/Ab$ ) | $(1-\epsilon) \cdot \frac{\epsilon}{3}$                                                                         | $(1-\epsilon)^2$                                                                             | $(1-\epsilon) \cdot \frac{2\epsilon}{3}$       | $\left(\frac{\epsilon}{3}\right)^2$                                                                             | $\frac{\epsilon}{3} \cdot (1-\epsilon)$                                                                         | $\frac{\epsilon}{3} \cdot \frac{2\epsilon}{3}$ | $\frac{2\epsilon}{3} \cdot \frac{\epsilon}{3}$                                                                              | $\frac{2\epsilon}{3} \cdot (1-\epsilon)$                                                                 | $\left(\frac{2\epsilon}{3}\right)^2$ |
| 3<br>( $aB/aB$ ) | $\frac{\epsilon}{3} \cdot (1-\epsilon)$                                                                         | $\left(\frac{\epsilon}{3}\right)^2$                                                          | $\frac{\epsilon}{3} \cdot \frac{2\epsilon}{3}$ | $(1-\epsilon)^2$                                                                                                | $(1-\epsilon) \cdot \frac{\epsilon}{3}$                                                                         | $(1-\epsilon) \cdot \frac{2\epsilon}{3}$       | $\frac{2\epsilon}{3} \cdot (1-\epsilon)$                                                                                    | $\frac{2\epsilon}{3} \cdot \frac{\epsilon}{3}$                                                           | $\left(\frac{2\epsilon}{3}\right)^2$ |
| 4<br>( $ab/ab$ ) | $\left(\frac{\epsilon}{3}\right)^2$                                                                             | $\frac{\epsilon}{3} \cdot (1-\epsilon)$                                                      | $\frac{\epsilon}{3} \cdot \frac{2\epsilon}{3}$ | $(1-\epsilon) \cdot \frac{\epsilon}{3}$                                                                         | $(1-\epsilon)^2$                                                                                                | $(1-\epsilon) \cdot \frac{2\epsilon}{3}$       | $\frac{2\epsilon}{3} \cdot \frac{\epsilon}{3}$                                                                              | $\frac{2\epsilon}{3} \cdot (1-\epsilon)$                                                                 | $\left(\frac{2\epsilon}{3}\right)^2$ |
| 5<br>( $AB/Ab$ ) | $\frac{1}{2}(1-\epsilon)^2 + \frac{1}{2} \cdot (1-\epsilon) \cdot \frac{\epsilon}{3}$                           | $\frac{1}{2} \cdot (1-\epsilon) \cdot \frac{\epsilon}{3} + \frac{1}{2}(1-\epsilon)^2$        | $(1-\epsilon) \cdot \frac{2\epsilon}{3}$       | $\frac{1}{2} \cdot \frac{\epsilon}{3} \cdot (1-\epsilon) + \frac{1}{2} \cdot \left(\frac{\epsilon}{3}\right)^2$ | $\frac{1}{2} \cdot \left(\frac{\epsilon}{3}\right)^2 + \frac{1}{2} \cdot \frac{\epsilon}{3} \cdot (1-\epsilon)$ | $\frac{\epsilon}{3} \cdot \frac{2\epsilon}{3}$ | $\frac{1}{2} \cdot \frac{2\epsilon}{3} \cdot (1-\epsilon) + \frac{1}{2} \cdot \frac{2\epsilon}{3} \cdot \frac{\epsilon}{3}$ | $\frac{1}{2} \cdot \frac{2\epsilon}{3} \cdot \frac{\epsilon}{3} + \frac{1}{2} \cdot \frac{2\epsilon}{3}$ | $\left(\frac{2\epsilon}{3}\right)^2$ |
| 6<br>( $aB/ab$ ) | $\frac{1}{2} \cdot \frac{\epsilon}{3} \cdot (1-\epsilon) + \frac{1}{2} \cdot \left(\frac{\epsilon}{3}\right)^2$ | $\frac{1}{2} \cdot \left(\frac{\epsilon}{3}\right)^2 + \frac{1}{2} \cdot \frac{\epsilon}{3}$ | $\frac{\epsilon}{3} \cdot \frac{2\epsilon}{3}$ | $\frac{1}{2}(1-\epsilon)^2 + \frac{1}{2} \cdot (1-\epsilon) \cdot \frac{\epsilon}{3}$                           | $\frac{1}{2} \cdot (1-\epsilon) \cdot \frac{\epsilon}{3} + \frac{1}{2}(1-\epsilon)^2$                           | $(1-\epsilon) \cdot \frac{2\epsilon}{3}$       | $\frac{1}{2} \cdot \frac{2\epsilon}{3} \cdot (1-\epsilon) + \frac{1}{2} \cdot \frac{2\epsilon}{3} \cdot \frac{\epsilon}{3}$ | $\frac{1}{2} \cdot \frac{2\epsilon}{3} \cdot \frac{\epsilon}{3} + \frac{1}{2} \cdot \frac{2\epsilon}{3}$ | $\left(\frac{2\epsilon}{3}\right)^2$ |

|               |                                                                                                                      |                                                                                                                      |                                                                                                                                  |                                                                                                                      |                                                                                                                      |                                                                                                                                                      |                                                                                |                                                                                                                                  |                                      |
|---------------|----------------------------------------------------------------------------------------------------------------------|----------------------------------------------------------------------------------------------------------------------|----------------------------------------------------------------------------------------------------------------------------------|----------------------------------------------------------------------------------------------------------------------|----------------------------------------------------------------------------------------------------------------------|------------------------------------------------------------------------------------------------------------------------------------------------------|--------------------------------------------------------------------------------|----------------------------------------------------------------------------------------------------------------------------------|--------------------------------------|
| 7<br>(AB/aB)  | $\frac{1}{2}(1-\epsilon)^2 + \frac{1}{2} \cdot \frac{\epsilon}{3} \cdot (1-\epsilon)$                                | $\frac{1}{2} \cdot (1-\epsilon) \cdot \frac{\epsilon}{3}$<br>$+ \frac{1}{2} \cdot \left(\frac{\epsilon}{3}\right)^2$ | $\frac{1}{2} \cdot (1-\epsilon) \cdot \frac{2\epsilon}{3}$<br>$+ \frac{1}{2} \cdot \frac{\epsilon}{3} \cdot \frac{2\epsilon}{3}$ | $\frac{1}{2} \cdot \frac{\epsilon}{3} \cdot (1-\epsilon)$<br>$+ \frac{1}{2}(1-\epsilon)^2$                           | $\frac{1}{2} \cdot \left(\frac{\epsilon}{3}\right)^2 + \frac{1}{2}$<br>$\cdot (1-\epsilon) \cdot \frac{\epsilon}{3}$ | $\frac{1}{2} \cdot \frac{\epsilon}{3} \cdot \frac{2\epsilon}{3} + \frac{1}{2}$<br>$\cdot (1-\epsilon) \cdot \frac{2\epsilon}{3}$                     | $\frac{2\epsilon}{3} \cdot (1-\epsilon)$                                       | $\frac{2\epsilon}{3} \cdot \frac{\epsilon}{3}$                                                                                   | $\left(\frac{2\epsilon}{3}\right)^2$ |
| 8<br>(Ab/ab)  | $\frac{1}{2} \cdot (1-\epsilon) \cdot \frac{\epsilon}{3}$<br>$+ \frac{1}{2} \cdot \left(\frac{\epsilon}{3}\right)^2$ | $\frac{1}{2}(1-\epsilon)^2 + \frac{1}{2} \cdot \frac{\epsilon}{3} \cdot (1-\epsilon)$                                | $\frac{1}{2} \cdot (1-\epsilon) \cdot \frac{2\epsilon}{3}$<br>$+ \frac{1}{2} \cdot \frac{\epsilon}{3} \cdot \frac{2\epsilon}{3}$ | $\frac{1}{2} \cdot \left(\frac{\epsilon}{3}\right)^2 + \frac{1}{2}$<br>$\cdot (1-\epsilon) \cdot \frac{\epsilon}{3}$ | $\frac{1}{2} \cdot \frac{\epsilon}{3} \cdot (1-\epsilon)$<br>$+ \frac{1}{2}(1-\epsilon)^2$                           | $\frac{1}{2} \cdot \frac{\epsilon}{3} \cdot \frac{2\epsilon}{3} + \frac{1}{2}$<br>$\cdot (1-\epsilon) \cdot \frac{2\epsilon}{3}$                     | $\frac{2\epsilon}{3} \cdot \frac{\epsilon}{3}$                                 | $\frac{2\epsilon}{3} \cdot (1-\epsilon)$                                                                                         | $\left(\frac{2\epsilon}{3}\right)^2$ |
| 9<br>(AB/ab)  | $\frac{1}{2}(1-\epsilon)^2 + \frac{1}{2} \cdot \left(\frac{\epsilon}{3}\right)^2$                                    | $(1-\epsilon) \cdot \frac{\epsilon}{3}$                                                                              | $\frac{1}{2} \cdot (1-\epsilon) \cdot \frac{2\epsilon}{3}$<br>$+ \frac{1}{2} \cdot \frac{\epsilon}{3} \cdot \frac{2\epsilon}{3}$ | $\frac{\epsilon}{3} \cdot (1-\epsilon)$<br>$+ \frac{1}{2}(1-\epsilon)^2$                                             | $\frac{1}{2} \cdot \left(\frac{\epsilon}{3}\right)^2$<br>$\cdot (1-\epsilon) \cdot \frac{2\epsilon}{3}$              | $\frac{1}{2} \cdot \frac{\epsilon}{3} \cdot \frac{2\epsilon}{3} + \frac{1}{2}$<br>$+ \frac{1}{2} \cdot \frac{2\epsilon}{3} \cdot \frac{\epsilon}{3}$ | $\frac{1}{2} \cdot \frac{2\epsilon}{3} \cdot (1-\epsilon)$                     | $\frac{1}{2} \cdot \frac{2\epsilon}{3} \cdot \frac{\epsilon}{3} + \frac{1}{2} \cdot \frac{2\epsilon}{3}$<br>$\cdot (1-\epsilon)$ | $\left(\frac{2\epsilon}{3}\right)^2$ |
| 10<br>(Ab/aB) | $(1-\epsilon) \cdot \frac{\epsilon}{3}$                                                                              | $\frac{1}{2}(1-\epsilon)^2 + \frac{1}{2} \cdot \left(\frac{\epsilon}{3}\right)^2$                                    | $\frac{1}{2} \cdot (1-\epsilon) \cdot \frac{2\epsilon}{3}$<br>$+ \frac{1}{2} \cdot \frac{\epsilon}{3} \cdot \frac{2\epsilon}{3}$ | $\frac{1}{2} \cdot \left(\frac{\epsilon}{3}\right)^2$<br>$+ \frac{1}{2}(1-\epsilon)^2$                               | $\frac{\epsilon}{3} \cdot (1-\epsilon)$<br>$\cdot (1-\epsilon) \cdot \frac{2\epsilon}{3}$                            | $\frac{1}{2} \cdot \frac{\epsilon}{3} \cdot \frac{2\epsilon}{3} + \frac{1}{2}$<br>$\cdot \frac{2\epsilon}{3} \cdot (1-\epsilon)$                     | $\frac{1}{2} \cdot \frac{2\epsilon}{3} \cdot \frac{\epsilon}{3} + \frac{1}{2}$ | $\frac{1}{2} \cdot \frac{2\epsilon}{3} \cdot (1-\epsilon)$<br>$+ \frac{1}{2} \cdot \frac{2\epsilon}{3} \cdot \frac{\epsilon}{3}$ | $\left(\frac{2\epsilon}{3}\right)^2$ |

---

$A$  and  $a$  denote candidate alleles (the two most abundant nucleotide reads in the population, e.g., C and T) and  $e$  denotes other nucleotide reads (e.g., in this case A and G) at site  $\alpha$ .  $B$  and  $b$  denote candidate alleles at site  $\beta$ . In the two-locus genotype notation, the slash separates haplotypes.
